# Supplementary material for: Unintended discontinuation of medication following hospitalisation: a retrospective cohort study
Source: PubMed Central journal article supplement — BMJ Open. 2019 Jun 4;9(6):e024747. doi: 10.1136/bmjopen-2018-024747 (PMC6561421; doi:10.1136/bmjopen-2018-024747), 2019-06-04
Supplement: bmjopen-2018-024747supp001.pdf [file bmjopen-2018-024747supp001.pdf]

## Supplementary Table 1

### Subgroup analysis of B01 subgroups and primary outcome of discontinuity

| Unadjusted OR (95%CI, p-value)          |                                                |                                |                                |                               |                                     | Adjusted OR (95%CI, p-value)            |                                                |                                              |                                |                                 |                                   |                                     |  |
|-----------------------------------------|------------------------------------------------|--------------------------------|--------------------------------|-------------------------------|-------------------------------------|-----------------------------------------|------------------------------------------------|----------------------------------------------|--------------------------------|---------------------------------|-----------------------------------|-------------------------------------|--|
|                                         | Aspirin and other antiplatelet agents: NO2BA   |                                | Warfarin + NOACs: B01AE B01AF  |                               | Warfarin + NOACs: B01AA B01AE B01AF |                                         |                                                | Aspirin and other antiplatelet agents: NO2BA |                                | Warfarin + NOACs: B01AE B01AF   |                                   | Warfarin + NOACs: B01AA B01AE B01AF |  |
|                                         | Antithrombotics (B01) (n=13,684)               | 01 B01AC (n=7613)              | Warfarin: B01 AA (n=1267)      | NOACs: B01AE B01AF (n=235)    | NOACs: B01AA B01AE B01AF (n=1475)   |                                         | Antithrombotics (B01) (n=13,684)               | 01 B01AC (n=7613)                            | Warfarin: B01 AA (n=1267)      | NOACs: B01AE B01AF (n=235)      | NOACs: B01AA B01AE B01AF (n=1475) |                                     |  |
| Hospitalised v non-hospitalised         | 0.95<br>(0.82,1.10),<br>p=0.49                 | 1.33<br>(1.15,1.53)<br>p<0.001 | 1.11<br>(0.82,1.50)<br>p=0.49  | 1.05<br>(0.47,2.35)<br>p=0.90 | 1.09<br>(0.78,1.53)<br>p=0.61       | Hospitalised v non-hospitalised         | 0.95<br>(0.81,1.11),<br>p=0.49                 | 1.30<br>(1.12,1.52)<br>p<0.001               | 0.95<br>(0.69,1.30)<br>p=0.74  | 1.01<br>(0.43,2.34)<br>p=0.99   | 0.97<br>(0.68,1.39)<br>p=0.88     |                                     |  |
| Age (years)                             | <b>1.02</b><br><b>(1.01,1.03)</b> ,<br>p<0.001 | 1.03<br>(1.02,1.04)<br>p<0.001 | 1.04<br>(1.01,1.06)<br>p<0.001 | 1.00<br>(0.94,1.05)<br>p=0.91 | 1.04<br>(1.01,1.06)<br>p<0.001      | Age (years)                             | <b>1.03</b><br><b>(1.02,1.04)</b> ,<br>p<0.001 | 1.03<br>(1.02,1.04)<br>p<0.001               | 1.05<br>(1.02,1.07)<br>p<0.001 | 1.00<br>(0.94,1.06)<br>p=0.96   | 1.04<br>(1.02,1.07)<br>p<0.001    |                                     |  |
| Gender: Female v Male                   | 1.02<br>(0.89,1.17),<br>p=0.79                 | 0.94<br>(0.83,1.08)<br>p=0.39  | 0.91<br>(0.68,1.23)<br>p=0.55  | 1.10<br>(0.53,2.31)<br>p=0.80 | 1.22<br>(0.88,1.69)<br>p=0.23       | Gender: Female v Male                   | 1.00<br>(0.87,1.15),<br>p=0.99                 | 0.88<br>(0.76,1.01)<br>p=0.07                | 0.81<br>(0.58,1.11)<br>p=0.19  | 1.24<br>(0.56,2.73)<br>p=0.59   | 1.18<br>(0.83,1.67)<br>p=0.36     |                                     |  |
| Private v Public (GMS/DVC) patients     | 5.10<br>(4.31,6.04),<br>p<0.001                | 3.89<br>(3.28,4.63)<br>p<0.001 | 3.87<br>(2.55,5.87)<br>p<0.001 | 3.72<br>(1.44,9.58)<br>p=0.01 | 4.05<br>(2.64,6.23)<br>p<0.001      | Private v Public (GMS/DVC) patients     | 5.35<br>(4.50,6.34),<br>p<0.001                | 4.26<br>(3.57,5.08)<br>p<0.001               | 4.33<br>(2.81,6.67)<br>p<0.001 | 4.42<br>(1.62,12.02)<br>p<0.001 | 4.38<br>(2.81,6.82)<br>p<0.001    |                                     |  |
| Number of repeat drug classes           | 0.99<br>(0.98,1.01),<br>p=0.56                 | 1.01<br>(0.99,1.03)<br>p=0.26  | 1.01<br>(0.97,1.05)<br>p=0.67  | 0.99<br>(0.90,1.10)<br>p=0.87 | 0.98<br>(0.93,1.02)<br>p=0.27       | Number of repeat drug classes           | 0.99<br>(0.97,1.01),<br>p=0.28                 | 1.00<br>(0.98,1.02)<br>p=0.86                | 1.01<br>(0.97,1.06)<br>p=0.52  | 0.95<br>(0.85,1.07)<br>p=0.38   | 0.97<br>(0.92,1.02)<br>p=0.23     |                                     |  |
| Charlson score (>=1 v0)                 | 0.93<br>(0.80,1.07),<br>p=0.31                 | 0.84<br>(0.73,0.97)<br>p=0.02  | 0.93<br>(0.69,1.26)<br>p=0.65  | 0.96<br>(0.46,2.00)<br>p=0.91 | 1.04<br>(0.74,1.46)<br>p=0.81       | Charlson score (>=1 v0)                 | 0.94<br>(0.80,1.09),<br>p=0.41                 | 0.81<br>(0.70,0.95)<br>p=0.01                | 0.84<br>(0.61,1.16)<br>p=0.29  | 1.07<br>(0.50,2.31)<br>p=0.87   | 1.00<br>(0.70,1.43)<br>p=1.00     |                                     |  |
| No of consultations in enrolment period | 1.00<br>(0.99,1.01),<br>p=0.62                 | 1.01<br>(1.00,1.01)<br>p=0.11  | 1.00<br>(0.99,1.02)<br>p=0.52  | 1.02<br>(0.98,1.06)<br>p=0.35 | 1.00<br>(0.98,1.01)<br>p=0.68       | No of consultations in enrolment period | 1.00<br>(0.99,1.01),<br>p=0.63                 | 1.01<br>(1.00,1.01)<br>p=0.23                | 1.00<br>(0.99,1.02)<br>p=0.48  | 1.03<br>(0.99,1.07)<br>p=0.15   | 1.00<br>(0.98,1.02)<br>p=0.98     |                                     |  |

Adjusted model includes gender, age, insurance type, Charlson Index, number of repeat drugs, number of consultations in the enrolment period

GMS: General Medical Services

DVC: Doctor Visit Card

OR: odds ratio

CI: confidence interval
