# Supplementary material for: Unintended discontinuation of medication following hospitalisation: a retrospective cohort study
Source: PubMed Central journal article supplement — BMJ Open. 2019 Jun 4;9(6):e024747. doi: 10.1136/bmjopen-2018-024747 (PMC6561421; doi:10.1136/bmjopen-2018-024747), 2019-06-04
Supplement: bmjopen-2018-024747supp002.pdf [file bmjopen-2018-024747supp002.pdf]

## Supplementary Table 2

### Association between number of hospital admissions and medication discontinuation at follow-up

|                                                   | Antithrombotics (B01)           |                                 | Lipid-lowering (C10)            |                                 | Thyroid meds(H03)                |                                   | Respiratory inhalers (R03)      |                                 |
|---------------------------------------------------|---------------------------------|---------------------------------|---------------------------------|---------------------------------|----------------------------------|-----------------------------------|---------------------------------|---------------------------------|
|                                                   | Unadjusted OR (95%CI, p-value)  | Adjusted OR (95%CI, p-value)    | Unadjusted OR (95%CI, p-value)  | Adjusted OR (95%CI, p-value)    | Unadjusted OR (95%CI, p-value)   | Adjusted OR (95%CI, p-value)      | Unadjusted OR (95%CI, p-value)  | Adjusted OR (95%CI, p-value)    |
| Hospitalised v non-hospitalised                   | 1.05<br>(0.99,1.11),<br>p=0.09  | 1.06<br>(0.98,1.12),<br>p=0.49  | 1.06<br>(1.00,1.12),<br>p=0.03  | 1.03<br>(0.97,1.10),<br>p=0.26  | 0.84<br>(0.65,1.08),<br>p=0.18   | 0.79<br>(0.59,1.06),<br>p=0.11    | 0.84<br>(0.74,0.96),<br>p=0.01  | 0.87<br>(0.76,0.99),<br>p=0.03  |
| Age (years)                                       | 1.02<br>(1.01,1.03),<br>p<0.001 | 1.02<br>(1.02,1.04),<br>p<0.001 | 1.04<br>(1.03,1.05),<br>p<0.001 | 1.05<br>(1.04,1.06),<br>p<0.001 | 1.03<br>(1.01,1.05),<br>p=0.002  | 1.06<br>(1.04,1.08),<br>p<0.001   | 1.02<br>(1.01,1.03),<br>p=0.004 | 1.03<br>(1.02,1.05),<br>p<0.001 |
| <u>Gender:</u><br>Female v Male                   | 1.02<br>(0.89,1.17),<br>p=0.79  | 1.01<br>(0.87,1.16),<br>p=0.90  | 0.85<br>(0.74,0.96),<br>p=0.01  | 0.83<br>(0.72,0.95),<br>p=0.01  | 0.84<br>(0.57,1.24),<br>p=0.38   | 0.85<br>(0.56,1.30),<br>p=0.46    | 1.04<br>(0.85,1.28),<br>p=0.68  | 1.04<br>(0.84,1.28),<br>p=0.74  |
| <u>Insurance type:</u> Private v GMS/DVC patients | 5.10<br>(4.31,6.04),<br>p<0.001 | 5.38<br>(4.54,6.39),<br>p<0.001 | 4.78<br>(4.06,5.62),<br>p<0.001 | 5.69<br>(4.80,6.74),<br>p<0.001 | 9.79<br>(6.90,13.89),<br>p<0.001 | 11.69<br>(8.04,16.96),<br>p<0.001 | 3.66<br>(2.78,4.82),<br>p<0.001 | 3.79<br>(2.87,5.02),<br>p<0.001 |
| Number of repeat drug classes                     | 0.99<br>(0.98,1.01),<br>p=0.56  | 0.99<br>(0.97,1.01),<br>p=0.25  | 1.01<br>(1.00,1.04),<br>p=0.04  | 1.01<br>(0.99,1.03),<br>p=0.28  | 0.98<br>(0.95,1.02),<br>p=0.41   | 0.98<br>(0.93,1.03),<br>p=0.44    | 0.97<br>(0.94,0.99),<br>p=0.01  | 0.97<br>(0.94,0.99),<br>p=0.02  |
| <u>Charlson score</u> (>=1 v0)                    | 0.93<br>(0.80,1.07),<br>p=0.31  | 0.93<br>(0.80,1.09),<br>p=0.37  | 1.05<br>(0.91,1.21),<br>p=0.48  | 0.97<br>(0.84,1.13),<br>p=0.70  | 0.78<br>(0.56,1.08),<br>p=0.15   | 0.79<br>(0.54,1.15),<br>p=0.21    | 0.66<br>(0.53,0.81),<br>p<0.001 | 0.71<br>(0.57,0.88),<br>p=0.001 |
| No of consultations in enrolment period           | 1.00<br>(0.99,1.01),<br>p=0.62  | 1.00<br>(0.99,1.01),<br>p=0.78  | 1.00<br>(0.99,1.01),<br>p=0.69  | 1.00<br>(0.99,1.01),<br>p=0.89  | 0.99<br>(0.97,1.00),<br>p=0.11   | 1.00<br>(0.98,1.02),<br>p=0.90    | 0.99<br>(0.98,1.00),<br>p=0.02  | 1.00<br>(0.99,1.01),<br>p=0.64  |

Adjusted model includes gender, age, insurance type, Charlson Index, number of repeat drugs, number of consultations in the enrolment period

GMS: General Medical Services

DVC: Doctor Visit Card

OR: odds ratio

CI: confidence interval
